# Supplementary material for: Liquid phase deposition of TiO2nanolayer affords CH3NH3PbI3/nanocarbon solar cells with high open-circuit voltage
Source: Royal Society of Chemistry journal article supplement (doi:10.1039/c4fd00155a), 2014-01-01
Supplement: c4fd00155a1.pdf [file c4fd00155a1.pdf]

## Supporting information

### Liquid Phase Deposition of $\text{TiO}_2$ Nanolayer Affords $\text{CH}_3\text{NH}_3\text{PbI}_3$ /Nanocarbon Solar Cells with High Open-Circuit Voltage

Haining Chen,<sup>a,†</sup> Zhanhua Wei,<sup>a,†</sup> Keyou Yan,<sup>a</sup> Ya Yi,<sup>b</sup> Jiannong Wang,<sup>b</sup> and Shihe Yang<sup>a,\*</sup>

<sup>a</sup> Department of Chemistry, William Mong Institute of Nano Science and Technology, The Hong Kong University of Science and Technology, Clear Water Bay, Kowloon, Hong Kong, China.

<sup>b</sup> Department of Physics, The Hong Kong University of Science and Technology, Clear Water Bay, Kowloon, Hong Kong, China.

<sup>†</sup>These authors contributed equally to this work.

\*Corresponding email: chsyang@ust.hk.

## Supplementary results:

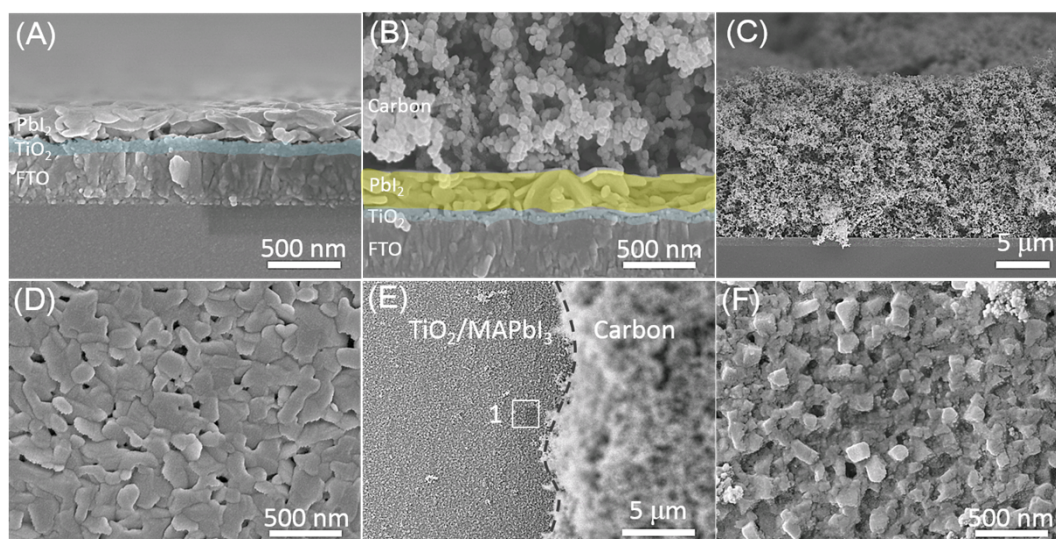

**Figure S1** SEM images of the  $\text{CH}_3\text{NH}_3\text{PbI}_3/\text{nanocarbon}$  solar cells at different preparation steps. Cross sectional images of (A) FTO/ $\text{TiO}_2$ / $\text{PbI}_2$ , (B) and (C) FTO/ $\text{TiO}_2$ / $\text{PbI}_2$ /nanocarbon. Top view images of (D) FTO/ $\text{TiO}_2$ / $\text{PbI}_2$ , (E) and (F) FTO/ $\text{TiO}_2$ / $\text{CH}_3\text{NH}_3\text{PbI}_3$ /nanocarbon.

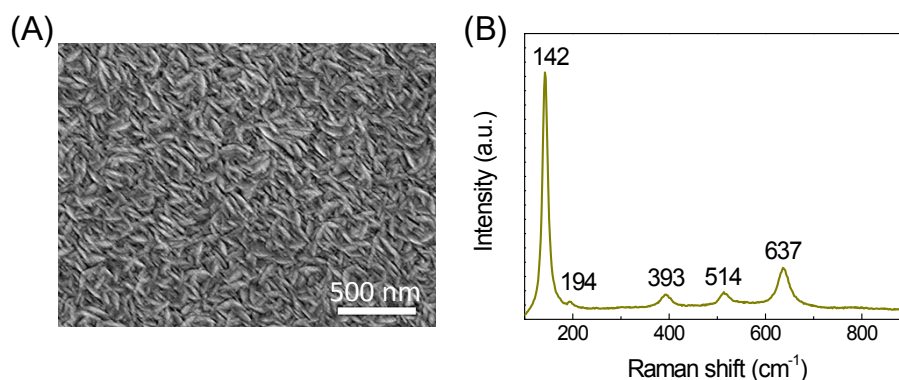

**Figure S2** Characterizations of the USP- $\text{TiO}_2$  nanolayer: (A) Top view SEM image and (B) Raman spectrum. As indicated in the Raman spectrum, the crystallinity of the LPD- $\text{TiO}_2$  nanolayer is obviously lower than that of the USP- $\text{TiO}_2$  nanolayer.

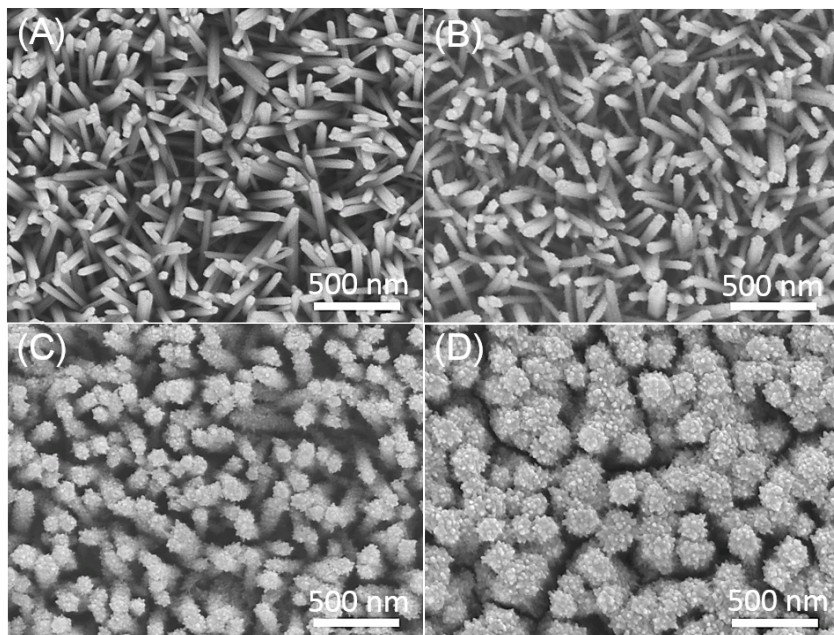

**Figure S3** Top view SEM images of TiO<sub>2</sub> NRs/LPD-TiO<sub>2</sub> nanolayer with different LPD durations: (A) 0 h, (B) 2 h, (C) 5 h and (D) 9 h.

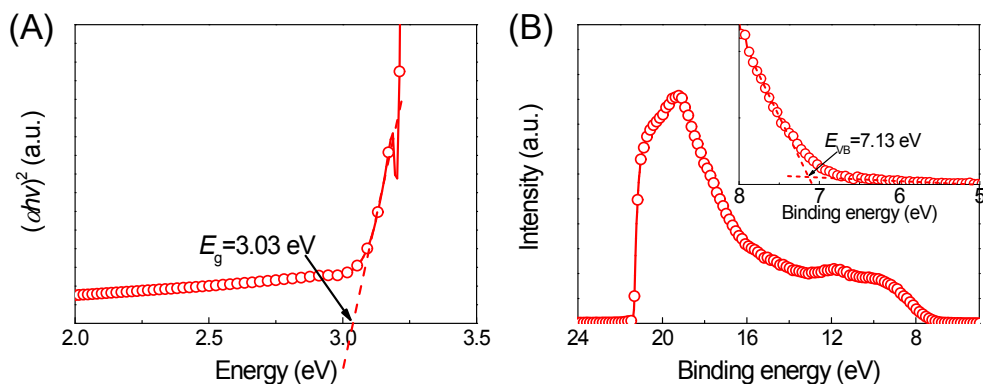

**Figure S4** Energy band structure of the rutile TiO<sub>2</sub> NR array: (A)  $(\alpha h\nu)^2-h\nu$  plot; (B) UPS spectrum. The  $E_{CB}$  is calculated to be -4.10 eV using the relation:  $E_g = E_{CB} - E_{VB}$ .
